# Supplementary material for: Geohazard detection using 3D seismic data to enhance offshore scientific drilling site selection
Source: Copernicus journal article supplement (doi:10.5194/sd-28-1-2020), 2020-12-01
Supplement: Supplementary file 1 [file sd-28-1-2020-supplement.pdf]

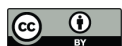

*Supplement of*

## **Geohazard detection using 3D seismic data to enhance offshore scientific drilling site selection**

**David R. Cox et al.**

*Correspondence to:* David R. Cox ([david.cox@manchester.ac.uk](mailto:david.cox@manchester.ac.uk))

The copyright of individual parts of the supplement might differ from the CC BY 4.0 License.

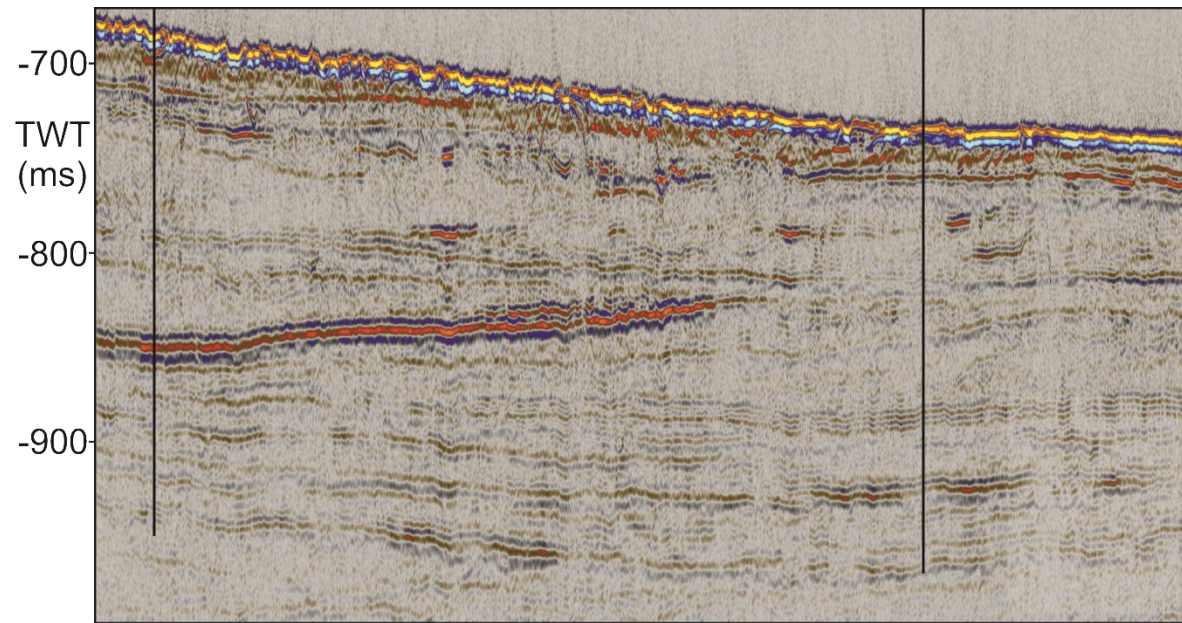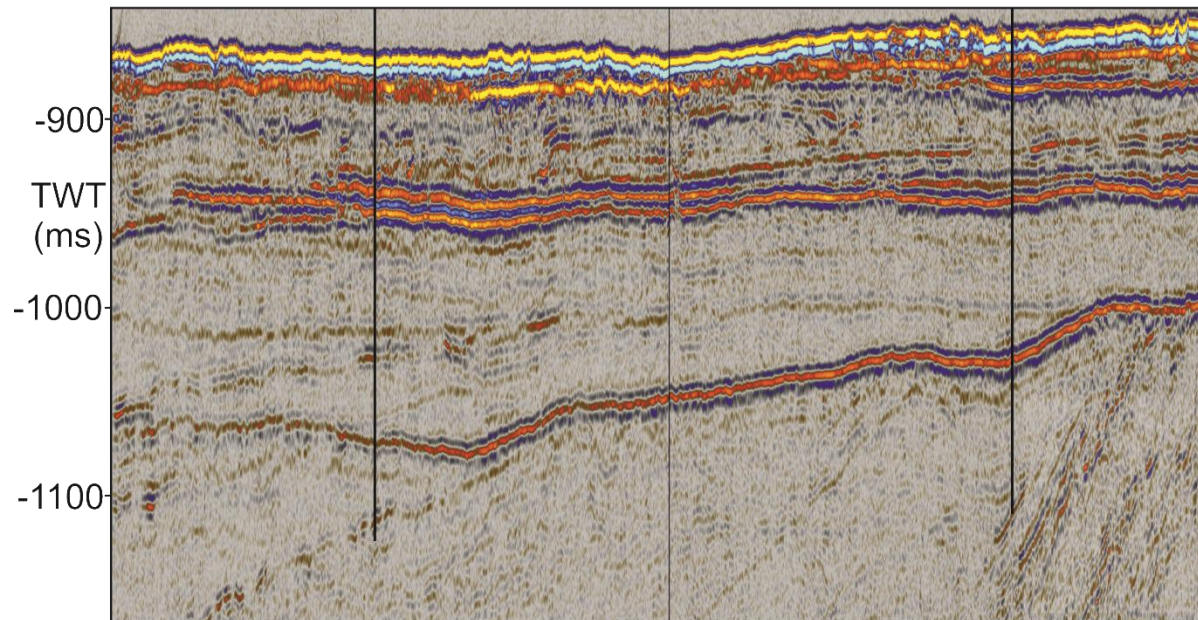

**Figure S1.**

Uninterpreted versions of the LAKO UHR seismic cross sections used within Figure 11 (A and B). Borehole names and scales are shown on Figure 11.



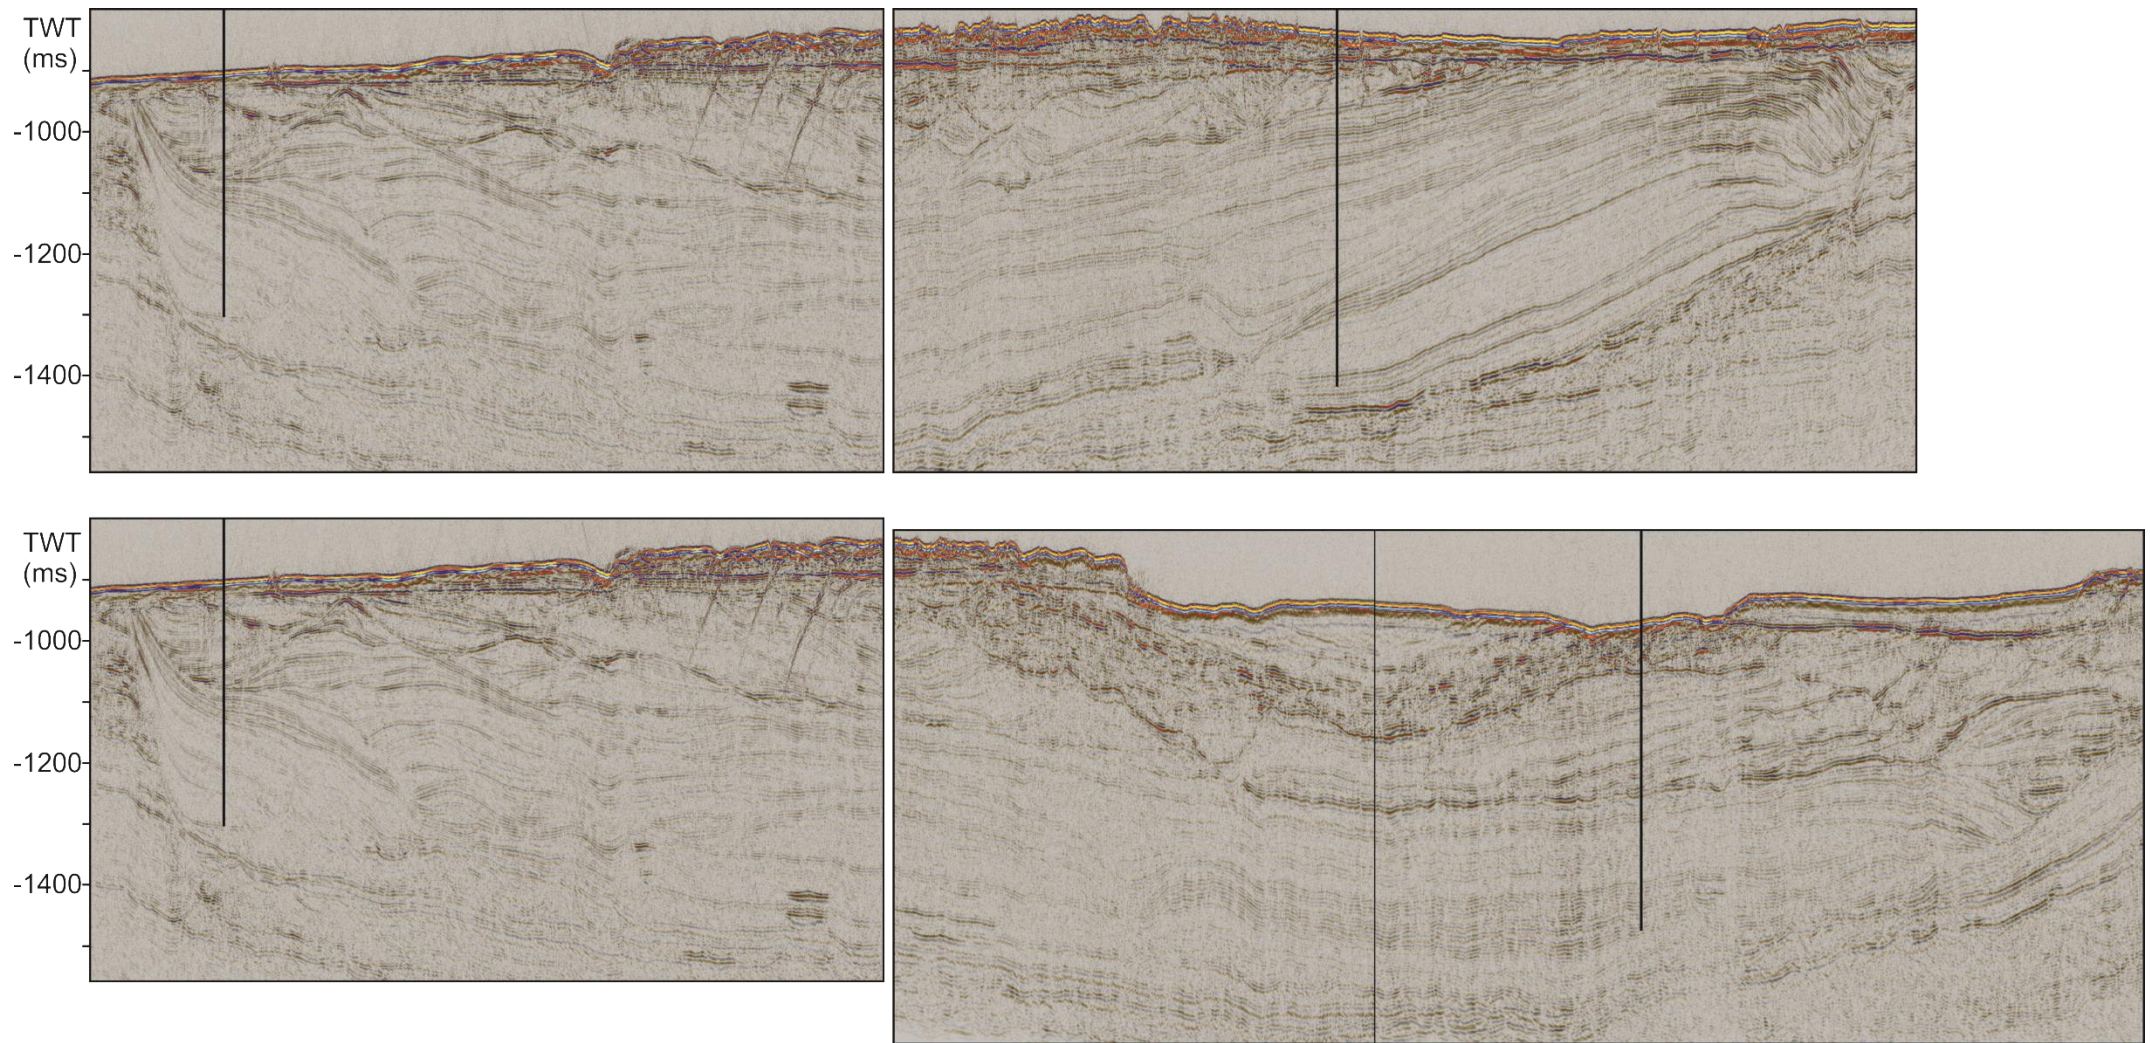

**Figure S2.**

Uninterpreted versions of the LAKO UHR seismic cross sections used within Figure 12 (A-B and A-D). Borehole names and scales are shown on Figure 12.



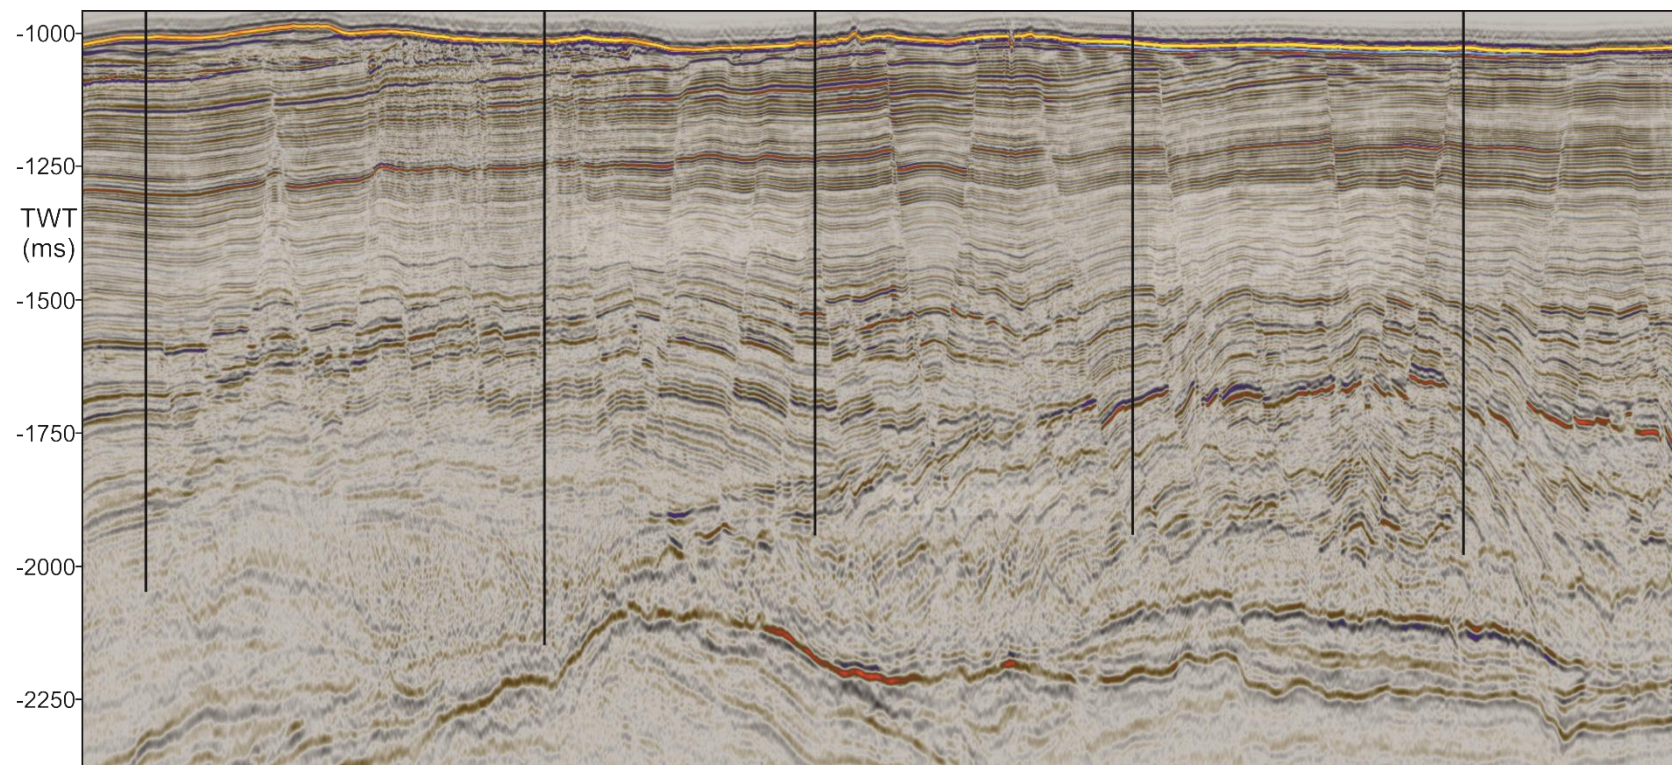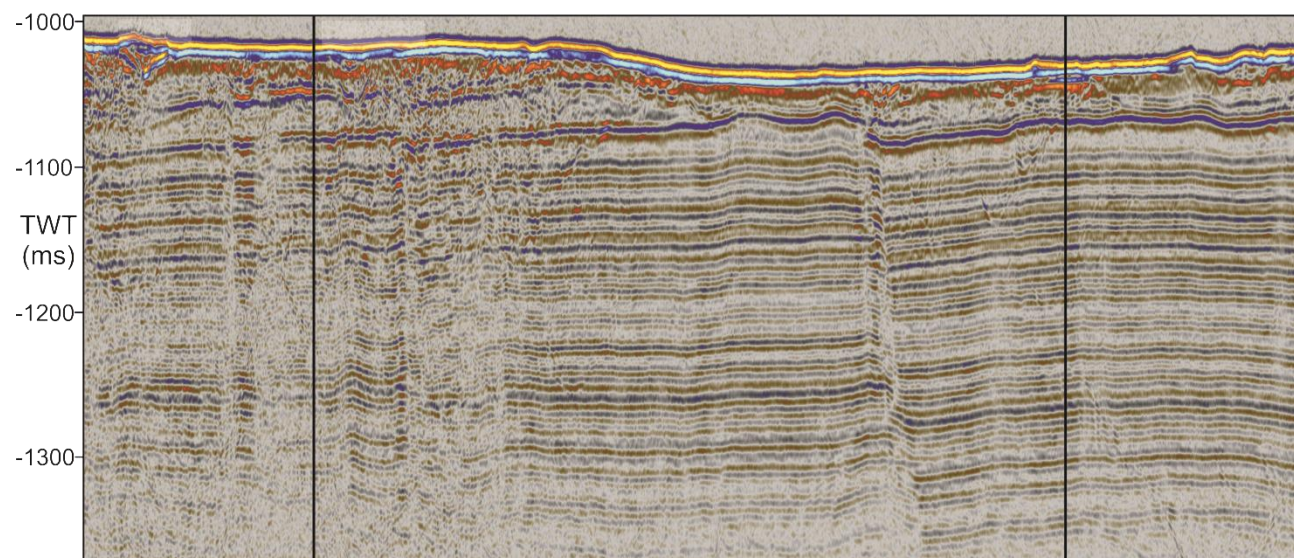

**Figure S3.**

Uninterpreted versions of the Pitu HR and LAKO UHR seismic cross sections used within Figure 14 (A and B). Borehole names and scales are shown on Figure 14.
